# Supplementary material for: Exosome-Shuttled circSHOC2 from IPASs Regulates Neuronal Autophagy and Ameliorates Ischemic Brain Injury via the miR-7670-3p/SIRT1 Axis
Source: PubMed Central journal article supplement — Mol Ther Nucleic Acids. 2020 Sep 26;22:657–72. doi: 10.1016/j.omtn.2020.09.027 (PMC7581834; doi:10.1016/j.omtn.2020.09.027), 2020-09-26
Supplement: mmc1.pdf [file mmc1.pdf]

**OMTN, Volume 22**

**Supplemental Information**

**Exosome-Shuttled circSHOC2 from IPASs Regulates  
Neuronal Autophagy and Ameliorates Ischemic  
Brain Injury via the miR-7670-3p/SIRT1 Axis**

**Wanghao Chen, Hong Wang, Zhihan Zhu, Jia Feng, and Lukui Chen**

## Supplemental figure legends

### **Supplement Fig. 1. IPAS-EXOs provide neuroprotection both *in vitro* and *in vivo*.**

(A) CCK-8 assays showing neuronal survival after pretreatments with different concentrations (5, 10, 20, 40  $\mu\text{g/ml}$ ) of IPAS-EXOs and subsequent OGD treatments. The cellular survival in the sham group was set to 100%. (B) TTC staining showing the volumetric changes of cerebral infarctions in mice. (C) Neurological scores showing the levels of neurobehavioral recovery of mice treated with PBS or IPAS-EXOs (\*P < 0.05).

### **Supplement Fig. 2. The quantification of TUNEL double-labeled cells in the brain tissue of each group (\*P < 0.05).**

### **Supplement Fig. 3. LDH assays and TUNEL assays confirmed that circSHOC2**

**confers a neuroprotective effect *in vitro*.** (A) LDH assays of neurons treated with IPAS-EXOs, si-circSHOC2-EXOs, or control siRNA-NC EXOs after OGD (\*P < 0.05). (B) LDH assays in control neurons, neurons treated with IPAS-EXOs, neurons treated with si-circSHOC2-EXOs, and neurons treated with circRNA-NC EXOs. (C) Numbers of TUNEL+ neurons treated with IPAS-EXOs, si-circSHOC2-EXOs, and control siRNA-NC EXOs after OGD (\*P < 0.05).

### **Supplement Fig. 4. circSHOC2 mimics regulated OGD-induced neuronal apoptosis**

**via promoting autophagy.** (A) Stable Gag-LC3-expressing cells were co-transfected with

a circSHOC2 mimics or circRNA-NC, and autophagy was tested under OGD or normal conditions for 6 h. Quantitative analysis of the amount of Gag-LC3 accumulation per cell was performed (\*P < 0.05). (B) Western blot analysis of LC3 in the circSHOC2 mimics group and circRNA-NC group (\*P < 0.05). (C) Western blot analysis of TIMM23 and SQSTM1 in the circSHOC2 mimics group and circRNA-NC group (\*P < 0.05).

**Supplement Fig. 5. circSHOC2 reduces OGD-induced neuronal death via the miR-7670a-3p/SIRT1 axis.** (A) Neurons were co-transfected with a circSHOC2 mimic, si-circSHOC2, miR-7670-3p mimic, or siRNA-7670-3p. Cells were treated with OGD for 6 h (\*P < 0.05). The expression of SIRT1 was analyzed by Western blotting. (B) Number of TUNEL+ neurons treated with circSHOC2, siRNA-SIRT1 and control siRNA-NC after OGD (\*P < 0.05). All siRNA sequences were shown in Supplementary Table 1.

Supplement Table 1. The primers used for qRT-PCR in this study. (Table S1)

---

**The primer sequences of gene-specific primers used for real-time RT-PCR:**

circSHOC2 Forward: 5'-AAAACCTTCACCTTCAACACCTGTGAAAGGGACTCC-3',

circSHOC2 Reverse: 5'-AAACCAAACCTGTCAGAATGGTAGATAAGAATAGTT-3';

GAPDH Forward: 5'- TCGTGGAAAGGACTCATGACC -3';

GAPDH Reverse: 5'- AGGCAGGGATGATGTTCTGG -3'.

---

**The primer Sequences of siRNA:**

si-circSHOC2 sense : GGGCCGGAAGUGGUAGGGGCGUCGGAAGAAGGGTT;

si-circSHOC2 antisense: CCCUUCUUCGACGCCCCUACCACUUCGGGCCCTT.

---

**The primer Sequences of siRNA-7670-3p:**

siRNA-7670-3p sense: 5'-UGGAUUUGUACCAUUCUUCUG-3',

siRNA-7670-3p antisense: 3'-GAAGAAUGGUACAAAUCCAAG-5'.

---

**The sequences of SIRT1 mRNA primers were:**

Forward, 5'- TAGACACGCTGGAACAGGTTGC-3';

Reverse, 5'- CTCCTCGTACAGCTTCACAGTC-3'.

---

**The siRNA sequences were used to silence SIRT1 expression:**

SIRT1-siRNA sense: 5'-AGAGUUGCCACCCACACCU-3',

SIRT1-siRNA antisense: 5'-AGGUGUGGGUGGCAACUCU-3'.

---

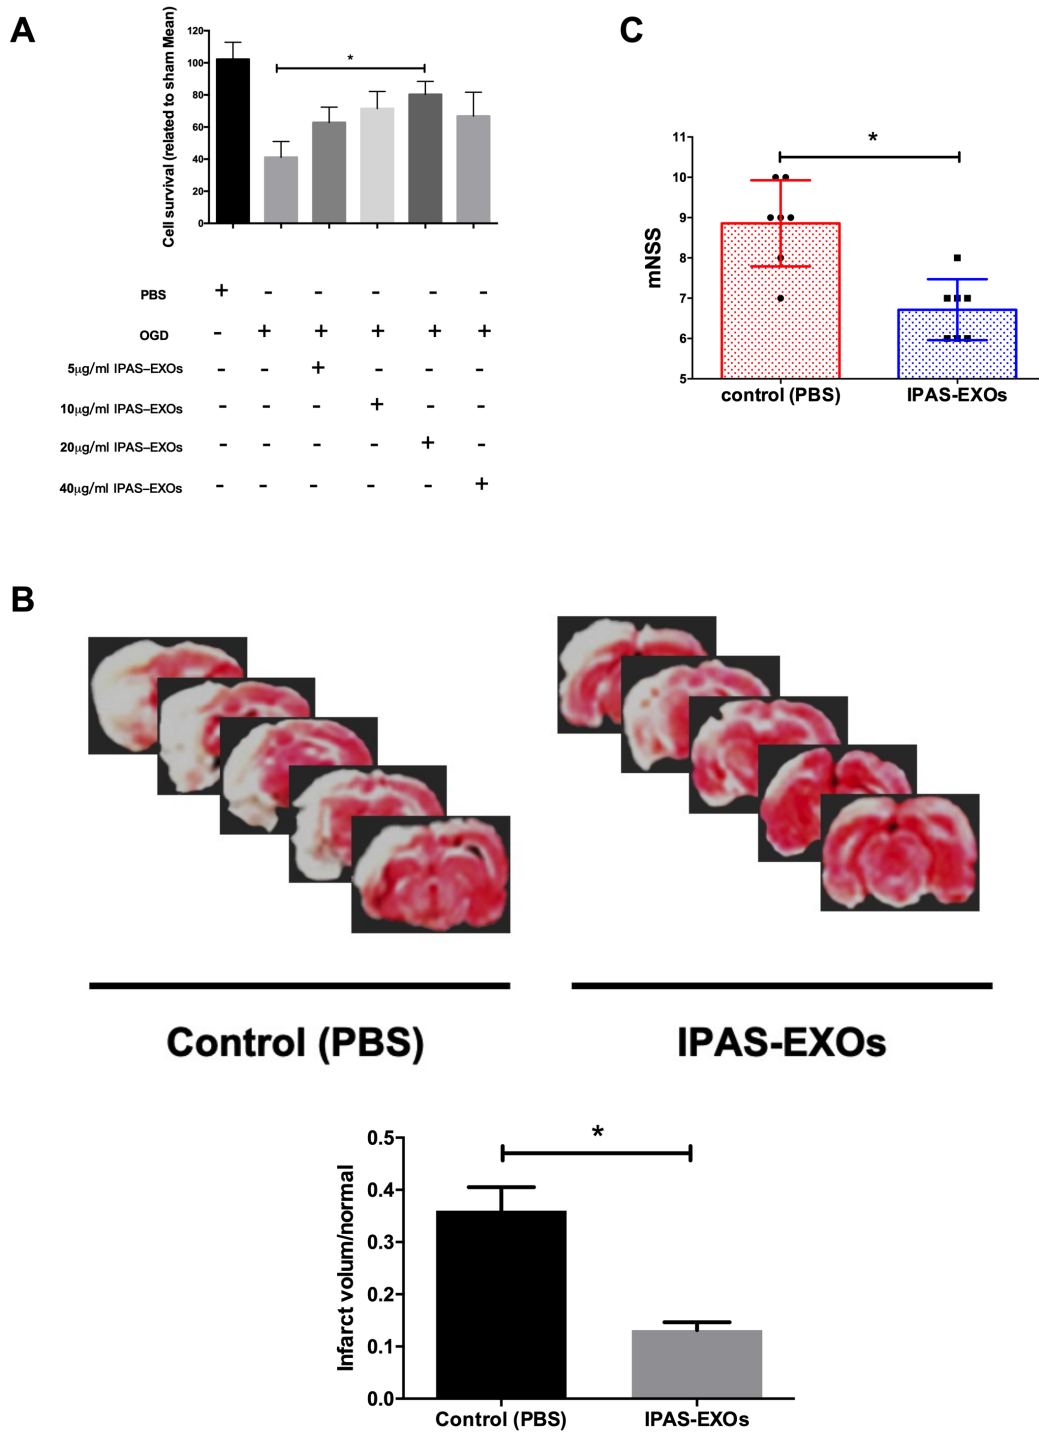

**Supplement Figure 1 (Figure S1).** IPAS-EXOs provide neuroprotection both *in vitro* and *in vivo*.

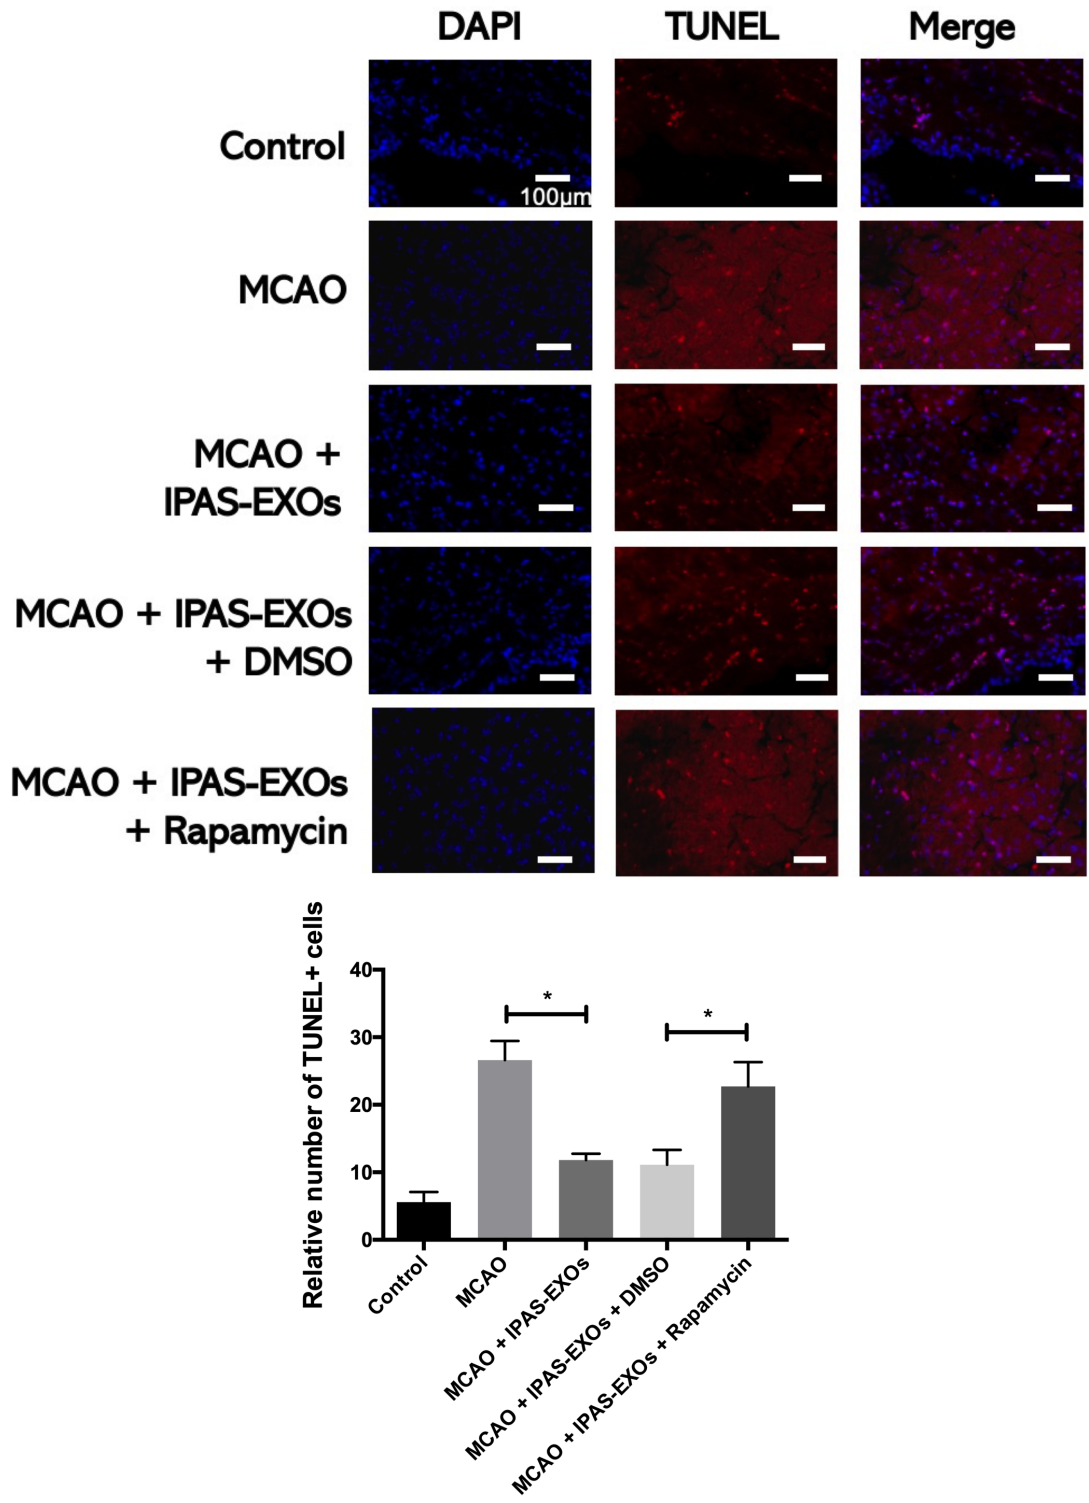

**Supplement Figure 2 (Figure S2).** The quantification of TUNEL double-labeled cells in the brain tissue of each group (\*P < 0.05).

**A**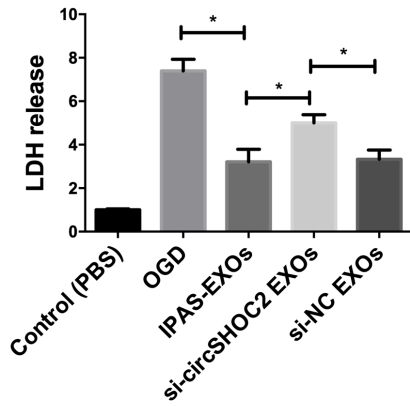**B**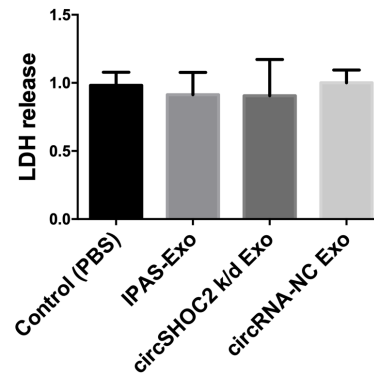**C**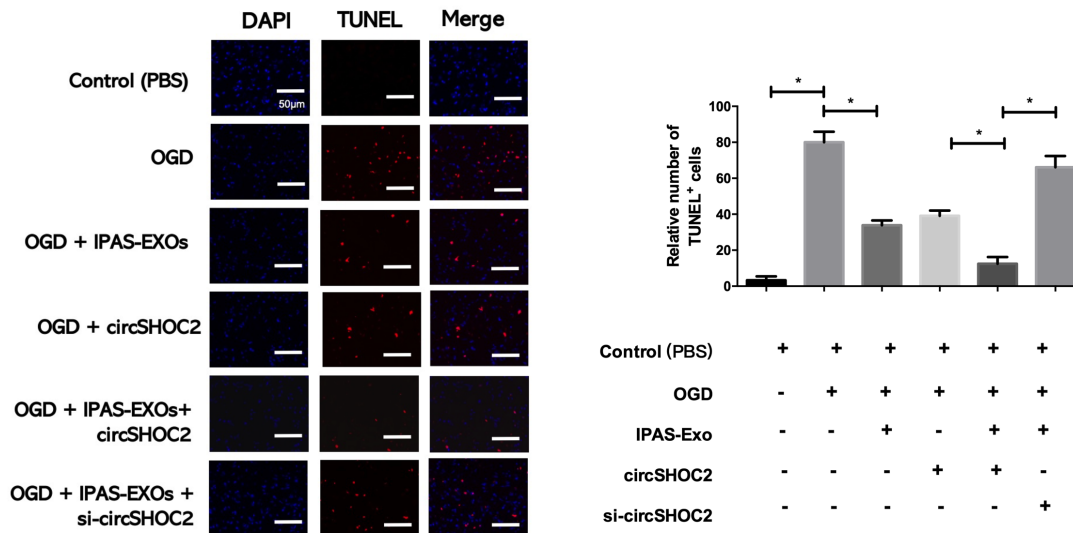

**Supplement Figure 3 (Figure S3).** LDH assays and TUNEL assays confirmed that circSHOC2 confers a neuroprotective effect *in vitro*.

**A**

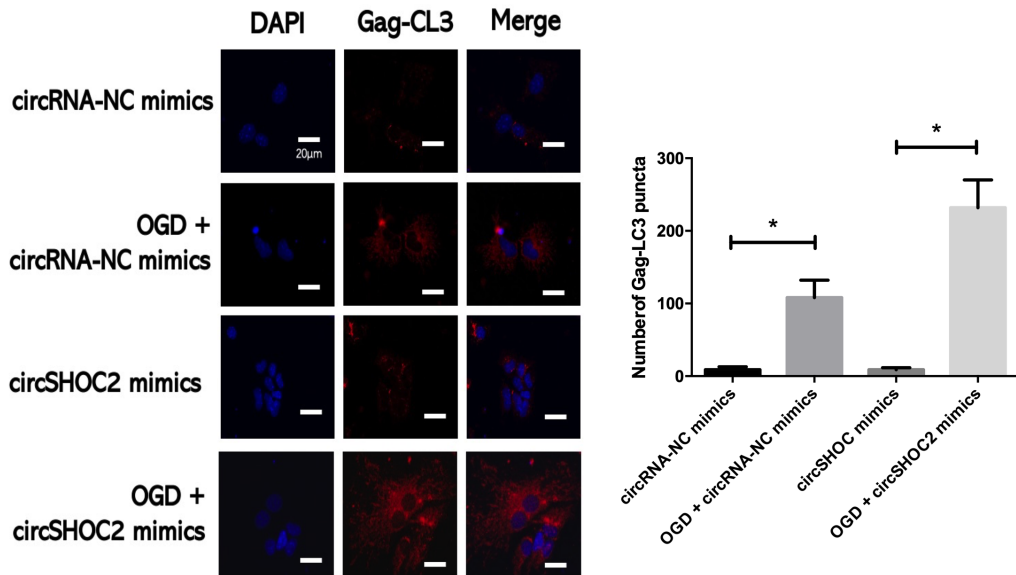

**B**

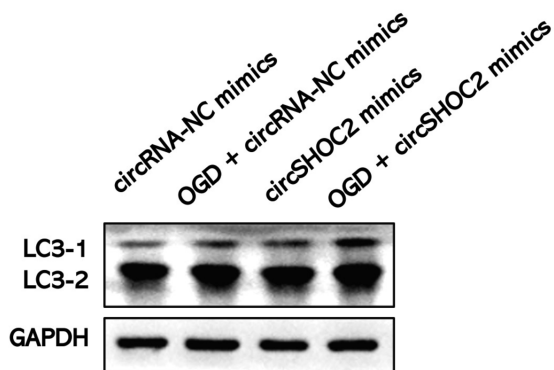

**C**

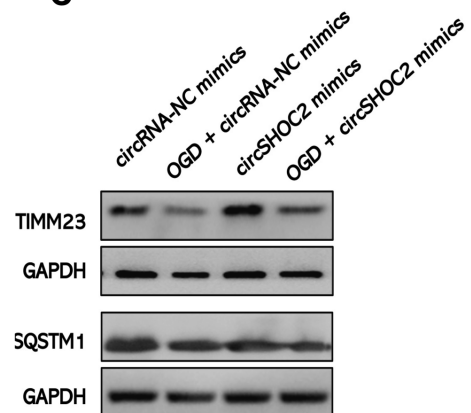

**Supplement Figure 4 (Figure S4).** circSHOC2 mimics regulated OGD-induced neuronal apoptosis via promoting autophagy.



**A**

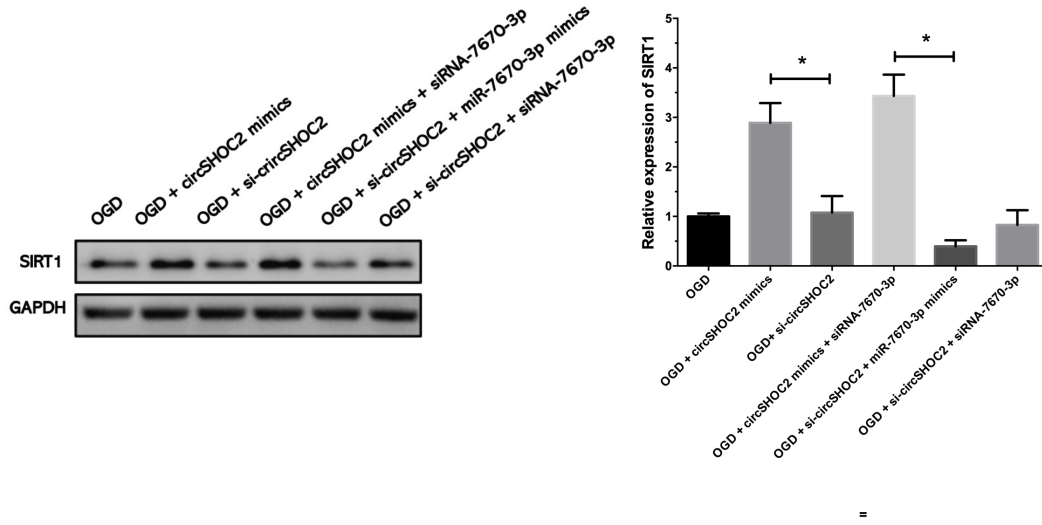

**B**

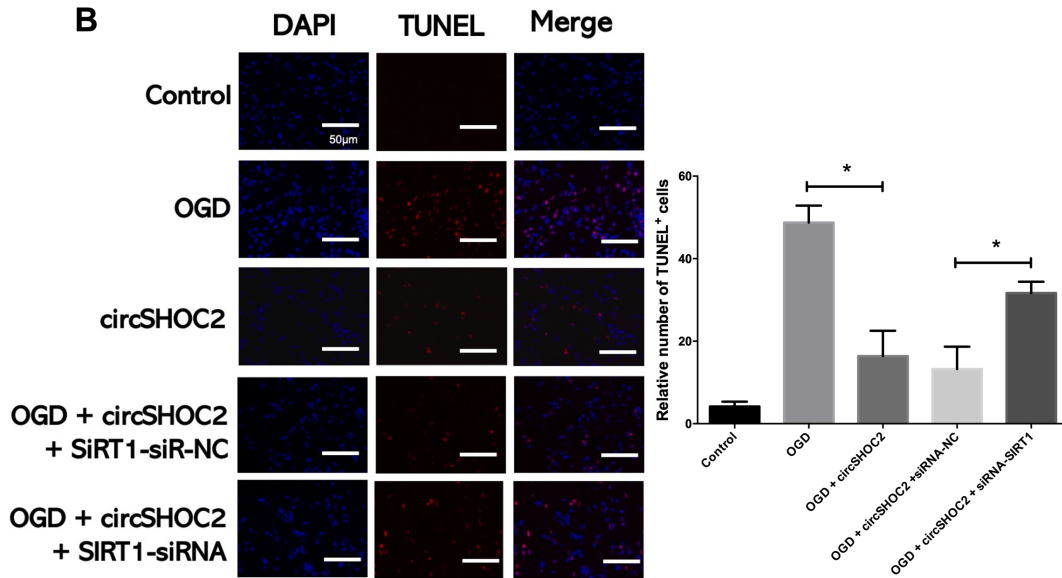

**Supplement Figure 5 (Figure S5).** circSHOC2 reduces OGD-induced neuronal death via the miR-7670a-3p/SIRT1 axis.
